# Supplementary material for: Behavior Change in Urban Mammals: A Systematic Review
Source: Frontiers journal article supplement (doi:10.3389/fevo.2020.576665), 2020-11-16
Supplement: Table_1.docx [file Table_1.docx]

Supplementary Material, Tables

Table S1: Search terms and results using *Web of Science* and *Google Scholar* for systematic literature review of urban mammal behavior change.

Searches and results using *Web of Science*

*Search 1*:

1: ALL = (urban AND behavior AND wild* OR change OR mod* OR adapt*) returned 19,237,587 records

2: ALL = mammal AND #1 returned 68,174 records

3: TS = (urban AND behavior AND wild*) AND #2 **returned 74 records**

*Search 2:*

1: ALL = (urban* AND beh* AND wild* OR animal AND chang* OR mod* OR adapt* OR alter*) returned 17, 711,647 records

2. TS = (urban*) AND #1 returned 202,626 records

3: TS = (wild* OR animal OR mammal) AND #2 returned 7,350 records

4: TS = (beh*) AND #3 returned 1,928 records

5: TS = (mod* OR change* OR alt* OR adapt*) AND #4 returned 1,589 records

6: TS = (mammal) AND #5 **returned 123 records**

*Search 3:*

1: ALL = (urban* AND beh* AND animal) returned 3,648 records

2: ALL = (urban* AND beh* AND mammal) returned 459 records

3: ALL = (urban* AND beh* AND wild*) returned 3,540 records

4: Combined above three using “OR” to eliminate redundancy, returned 6,532 records

5: ALL = (chang* OR mod* OR adapt* OR alter* OR evol*) AND #4 returned 4,759 records

6: TS = (urban* OR city) AND #5 returned 2,157 records

7: TS = (animal OR mammal OR wild*) AND #5 returned 2,851 records

8: TS = (beh* AND chang* OR mod* OR alter* OR adapt*) AND #5 returned 4,170 records

9: Combined 6, 7 “AND” 8 to combine results and eliminate redundancy returned 1,603 records

10: TI = (urban* OR city OR metro* OR town*) AND #9 returned 575 records

11: #10 NOT TS = (fire) returned 511 records

12: #10 NOT TI = (bird OR lizard) returned 507 records

13: Combined 11 “AND” 12 (eliminated redundancies) **returned 443 records**

Searches and results using *Google Scholar*

*Search 1:*

With all words “urban AND wildlife”, with at least one “behavior OR change”, without words “bird AND dog AND cat” in the title **returned 7 records**

*Search 2:*

with all of words “urban AND mammal, with at least one “behavior OR change”, without words “bird AND dog AND cat” in the title **returned 49 records**

*Search 3:*

1: with all words “urban AND animal AND behavior”, with at least one “mammal OR wildlife” anywhere in article returned 209,000 records

2: #1 with exact phrase “behavior change”, returned 3,890 records

3: #2 without “gaming, medical, drug, disorder, disease, children, student, voter, climate, culture, heat, island, amphibian, reptile, insect” **returned 80 records**
