# Supplementary material for: Behavior Change in Urban Mammals: A Systematic Review
Source: Frontiers journal article supplement (doi:10.3389/fevo.2020.576665), 2020-11-16
Supplement: Table_2.xlsx [file Table_2.xlsx]

## Sheet: S2_Behaviors_observed_by_study
Table S2. Dataset of 166 behavior observations of urban mammals from studies conducted from 1987-2020.
Pub_yr	Author	Publication	Journal_type	Species	Guild	Behavior_studied	Change	Y/N	Behavior_type	Adaptive_response	Region	Comparative setting
1987	Adams, R. A., Lengas, B. J., & Bekoff	Journal of Mammalogy	Zoology/Mammalogy	T. vulpecula	herbivore	AD (alert distance)	decrease	Y	alert behavior/response	Regulatory	North America	uncultivated farmland				US Northwest	multi	direct obs
1987	Adams, R. A., Lengas, B. J., & Bekoff	Journal of Mammalogy	Zoology/Mammalogy	T. vulpecula	herbivore	avoidance	decrease	Y	alert behavior/response	Regulatory	North America	uncultivated farmland				US Northwest	multi	direct obs
2014	Adams, AL; Recio, MR; Robertson, BC; Dickinson, KJM; van Heezik, Y	BIOLOGICAL INVASIONS	Biology	C. ludovicianus	carnivore	diet preference	increase	Y	foraging/diet/resource use	Acclimatory	Australia	forest fragments
2014	Adams, AL; Recio, MR; Robertson, BC; Dickinson, KJM; van Heezik, Y	BIOLOGICAL INVASIONS	Biology	C. ludovicianus	carnivore	home-range	increase	Y	spatial	Acclimatory	Australia	forest fragments
2019	Alldredge, MW; Buderman, FE; Blecha, KA	ECOLOGY AND EVOLUTION	Ecology	P. concolor	carnivore	den selection	shift	Y	mating/reproduction	Acclimatory	North America	wildland
2019	Alldredge, MW; Buderman, FE; Blecha, KA	ECOLOGY AND EVOLUTION	Ecology	P. concolor	carnivore	resource selection	shift	Y	foraging/diet/resource use	Acclimatory	North America	wildland
2015	Atiqah, N; Akbar, Z; Syafrinna; Ubaidah, N; Foo, NY	AIP Conference Proceedings	General Science	S. kuhlii	carnivore	home-range	shift	Y	spatial	Acclimatory	Asia	non-urban
2015	Atiqah, N; Akbar, Z; Syafrinna; Ubaidah, N; Foo, NY	AIP Conference Proceedings	General Science	S. kuhlii	carnivore	time foraging	decrease	Y	foraging/diet/resource use	Acclimatory	Asia	non-urban
2019	Back, JP; Suzin, A; Aguiar, LM	ZOOLOGIA	Zoology/Mammalogy	Sapajus Sp.	omnivore	activity budget	shift	Y	activity	Acclimatory	South America	continuous forest
2019	Back, JP; Suzin, A; Aguiar, LM	ZOOLOGIA	Zoology/Mammalogy	Sapajus Sp.	omnivore	conspecific tolerance	increase	Y	social	Acclimatory	South America	continuous forest
2014	Bateman, PW; Fleming, PA	JOURNAL OF ZOOLOGY	Zoology/Mammalogy	S. carolinensis	omnivore	alert response	shift*	Y	alert behavior/response	Regulatory	North America	urban gradient**
2014	Bateman, PW; Fleming, PA	JOURNAL OF ZOOLOGY	Zoology/Mammalogy	S. carolinensis	omnivore	FID (flight initiation distance)	decrease	Y	alert behavior/response	Regulatory	North America	urban gradient**
2014	Bateman, PW; Fleming, PA	JOURNAL OF ZOOLOGY	Zoology/Mammalogy	S. carolinensis	omnivore	vigilance/caution	decrease	Y	alert behavior/response	Regulatory	North America	urban gradient**
2003	Beckman and Berger	Journal of Zoology	Zoology/Mammalogy	U. americanus	carnivore	activity budget	shift	Y	activity	Acclimatory	North America	wildland
2003	Beckman and Berger	Journal of Zoology	Zoology/Mammalogy	U. americanus	carnivore	denning time	decrease	Y	mating/reproduction	Acclimatory	North America	wildland
2003	Beckman and Berger	Journal of Zoology	Zoology/Mammalogy	U. americanus	carnivore	nocturnality	increase	Y	diel	Acclimatory	North America	wildland
2008	Beckmann, Jon P.; Lackey, Carl W.	Ecological Applications	Ecology	U. americanus	carnivore	fecundity	increase	Y	mating/reproduction	Acclimatory	North America	wildland
2016	Benson, JF; Sikich, JA; Riley, SPD	PLOS ONE	General Science	P. concolor	carnivore	foraging/hunting	shift	Y	foraging/diet/resource use	Acclimatory	North America	urban-wild gradient**
2016	Benson, JF; Sikich, JA; Riley, SPD	PLOS ONE	General Science	P. concolor	carnivore	avoidance	shift*	Y	alert behavior/response	Regulatory	North America	urban-wild gradient**
1996	Bowers, Michael A.; Breland, Bianca	Ecological Applications	Ecology	S. carolinensis	omnivore	foraging/hunting	shift	Y	foraging/diet/resource use	Acclimatory	North America	urban-rural gradient**
1996	Bowers, Michael A.; Breland, Bianca	Ecological Applications	Ecology	S. carolinensis	omnivore	GUD (giving up density)	decrease	Y	alert behavior/response	Regulatory	North America	urban-rural gradient**
2011	Brearley, G; McAlpine, C; Bell, S; Bradley, A	JOURNAL OF ZOOLOGY	Zoology/Mammalogy	P. norfolcensis	carnivore	home-range	decrease	Y	spatial	Acclimatory	Australia	forest fragments
2019	Breck, S. W., Poessel, S. A., Mahoney, P., & Young, J. K.	Scientific Reports	General Science	C. latrans	carnivore	boldness	increase	Y	behavioral syndrome	Developmental	North America	rural
2019	Breck, S. W., Poessel, S. A., Mahoney, P., & Young, J. K.	Scientific Reports	General Science	C. latrans	carnivore	exploratory	increase	Y	behavioral syndrome	Developmental	North America	rural
2020	Brooks, J., Kays, R., & Hare, B.	BEHAVIOUR	Behavior	C. latrans	carnivore	boldness	increase	Y	behavioral syndrome	Developmental	North America	urban-wild gradient*
2012	Chapman, T; Rymer, T; Pillay, N	NATURWISSENSCHAFTEN	General Science	X. inauris	omnivore	anti-predator	decrease	Y	alert behavior/response	Regulatory	Africa	rural
2012	Chapman, T; Rymer, T; Pillay, N	NATURWISSENSCHAFTEN	General Science	X. inauris	omnivore	FID (flight initiation distance)	decrease	Y	alert behavior/response	Regulatory	Africa	rural
2012	Chapman, T; Rymer, T; Pillay, N	NATURWISSENSCHAFTEN	General Science	X. inauris	omnivore	vigilance/caution	decrease	Y	alert behavior/response	Regulatory	Africa	rural
2013	Coleman, JL; Barclay, RMR	JOURNAL OF MAMMALOGY	Zoology/Mammalogy	L. noctivagans/E. fuscus/Myotis spp	carnivore	foraging/hunting	none	N	NA	NA	North America	natural
2004	Contesse, P; Hegglin, D; Gloor, S; Bontadina, F; Deplazes, P	MAMMALIAN BIOLOGY	Zoology/Mammalogy	V. vulpes	omnivore	resource selection	shift	Y	foraging/diet/resource use	Acclimatory	Europe	periurban
2018	Correa, FM; Chaves, OM; Printes, RC; Romanowski, HP	AMERICAN JOURNAL OF PRIMATOLOGY	Zoology/Mammalogy	A. guariba clamitans	herbivore	diet preference	shift	Y	foraging/diet/resource use	Acclimatory	South America	urban-rural gradient**
2018	Correa, FM; Chaves, OM; Printes, RC; Romanowski, HP	AMERICAN JOURNAL OF PRIMATOLOGY	Zoology/Mammalogy	A. guariba clamitans	herbivore	foraging/hunting	shift	Y	foraging/diet/resource use	Acclimatory	South America	urban-rural gradient**
2018	Correa, FM; Chaves, OM; Printes, RC; Romanowski, HP	AMERICAN JOURNAL OF PRIMATOLOGY	Zoology/Mammalogy	guariba clamitans	herbivore	anti-predator	decrease	Y	alert behavior/response	Regulatory	South America	urban-rural gradient**
2019	Cronk, NE; Pillay, N	ANIMALS	Zoology/Mammalogy	C. penicillata	carnivore	diet preference	shift	Y	foraging/diet/resource use	Acclimatory	Africa	non-urban
2019	Cronk, NE; Pillay, N	ANIMALS	Zoology/Mammalogy	C. penicillata	carnivore	home-range	decrease	Y	spatial	Acclimatory	Africa	non-urban
2009	Davison, J; Huck, M; Delahay, RJ; Roper, TJ	JOURNAL OF ZOOLOGY	Zoology/Mammalogy	M. meles	carnivore	diet preference	increase	Y	foraging/diet/resource use	Acclimatory	Europe	rural
2009	Davison, J; Huck, M; Delahay, RJ; Roper, TJ	JOURNAL OF ZOOLOGY	Zoology/Mammalogy	M. meles	carnivore	home-range	decrease	Y	spatial	Acclimatory	Europe	rural
1997	Doncaster, CP; Macdonald, DW	Animal Ecology	Ecology	V. vulpes	omnivore	home-range	increase	Y	spatial	Acclimatory	Europe	suburban
1997	Doncaster, CP; Macdonald, DW	Animal Ecology	Ecology	V. vulpes	omnivore	territoriality	shift	Y	spatial	Acclimatory	Europe	suburban
2010	Dowding, CV; Harris, S; Poulton, S; Baker, PJ	ANIMAL BEHAVIOUR	Behavior	E. europaeus	omnivore	spatial patterns	shift	Y	spatial	Acclimatory	Europe	rural
2010	Dowding, CV; Harris, S; Poulton, S; Baker, PJ	ANIMAL BEHAVIOUR	Behavior	E. europaeus	omnivore	diel activity	shift	Y	diel	Acclimatory	Europe	rural
2010	Dowding, CV; Harris, S; Poulton, S; Baker, PJ	ANIMAL BEHAVIOUR	Behavior	E. europaeus	omnivore	avoidance	increase	Y	alert behavior/response	Regulatory	Europe	rural
2019	Ellington, EH; Gehrt, SD	BEHAVIORAL ECOLOGY	Behavior	C. latrans	carnivore	home-range	increase	Y	spatial	Acclimatory	North America	urban-natural gradient**
2019	Ellington, EH; Gehrt, SD	BEHAVIORAL ECOLOGY	Behavior	C. latrans	carnivore	time encamped	increase	Y	activity	Acclimatory	North America	urban-natural gradient**
2019	Ellington, EH; Gehrt, SD	BEHAVIORAL ECOLOGY	Behavior	C. latrans	carnivore	time traveling	increase	Y	activity	Acclimatory	North America	urban-natural gradient**
2011	Fitzgibbon, SI; Wilson, RS; Goldizen, AW	AUSTRAL ECOLOGY	Ecology	I. macrourus	omnivore	home-range	decrease	Y	spatial	Acclimatory	Australia	rural
2019	Gallo, T; Fidino, M; Lehrer, EW; Magle, S	JOURNAL OF ANIMAL ECOLOGY	Ecology	O. virginianus	herbivore	diel activity	none	N	NA	NA	North America	urban gradient**
2019	Gallo, T; Fidino, M; Lehrer, EW; Magle, S	JOURNAL OF ANIMAL ECOLOGY	Ecology	O. cuniculus	herbivore	diel activity	none	N	NA	NA	North America	urban gradient**
2019	Gallo, T; Fidino, M; Lehrer, EW; Magle, S	JOURNAL OF ANIMAL ECOLOGY	Ecology	O. virginianus	herbivore	vigilance/caution	none	N	NA	NA	North America	urban gradient**
2019	Gallo, T; Fidino, M; Lehrer, EW; Magle, S	JOURNAL OF ANIMAL ECOLOGY	Ecology	O. virginianus	herbivore	anti-predator	shift	Y	alert behavior/response	Regulatory	North America	urban gradient**
2019	Gallo, T; Fidino, M; Lehrer, EW; Magle, S	JOURNAL OF ANIMAL ECOLOGY	Ecology	O. cuniculus	herbivore	anti-predator	shift	Y	alert behavior/response	Regulatory	North America	urban gradient**
2019	Gallo, T; Fidino, M; Lehrer, EW; Magle, S	JOURNAL OF ANIMAL ECOLOGY	Ecology	O. cuniculus	herbivore	vigilance/caution	increase	Y	alert behavior/response	Regulatory	North America	urban gradient**
2009	Gehrt, Stanley D.; Anchor, Chris; White, Lynsey A.	Journal of Mammalogy	Zoology/Mammalogy	C. latrans	carnivore	home-range	decrease	Y	spatial	Acclimatory	North America	urban gradient**
2012	Gese, E. M., P. S. Morey, and S. D. Gehrt	Journal of Ethology	Behavior	C. latrans	carnivore	home-range	decrease	Y	spatial	Acclimatory	North America	urban gradient**
2012	Gese, E. M., P. S. Morey, and S. D. Gehrt	Journal of Ethology	Behavior	C. latrans	carnivore	nocturnality	increase	Y	diel	Acclimatory	North America	urban gradient**
2012	Gese, E. M., P. S. Morey, and S. D. Gehrt	Journal of Ethology	Behavior	C. latrans	carnivore	spatial patterns	shift	Y	spatial	Acclimatory	North America	urban gradient**
2019	Gomes, DJ; Wierzbowska, I; Bevanger, K; O'Mahony, DT; Rola, K	EUROPEAN JOURNAL OF WILDLIFE RESEARCH	Wildlife Science	M. meles	carnivore	diet preference	none	N	NA	NA	Europe	rural
2001	Grinder, Martha I.; Krausman, Paul R.	The Journal of Wildlife Management	Wildlife Science	C. latrans	carnivore	home-range	decrease	Y	spatial	Acclimatory	North America	urban-natural gradient **
2001	Grinder, Martha I.; Krausman, Paul R.	The Journal of Wildlife Management	Wildlife Science	C. latrans	carnivore	nocturnality	increase	Y	diel	Acclimatory	North America	urban-natural gradient**
2009	Grubbs, S. E., and P. R. Krausman	The Southwestern Naturalist	General Science	C. latrans	carnivore	home-range	increase	Y	spatial	Acclimatory	North America	urban-natural gradient**
2009	Grubbs, S. E., and P. R. Krausman	The Southwestern Naturalist	General Science	C. latrans	carnivore	nocturnality	increase	Y	diel	Acclimatory	North America	urban-natural gradient**
2018	Hamalainen, S; Fey, K; Selonen, V	LANDSCAPE AND URBAN PLANNING	Landscape/Urban Planning	S. vulgaris	herbivore	resource selection	shift	Y	foraging/diet/resource use	Acclimatory	Europe	natural
2005	Harmon, Luke J.; Bauman, Karen; McCloud, Matt; Parks, John; Howell, Shannon; Losos, Jonathan B.	Zoo Biology: Published in affiliation with the American Zoo and Aquarium Association	Zoology/Mammalogy	D. virginiana	omnivore	home-range	decrease	Y	spatial	Acclimatory	North America	rural
2005	Harmon, Luke J.; Bauman, Karen; McCloud, Matt; Parks, John; Howell, Shannon; Losos, Jonathan B.	Zoo Biology: Published in affiliation with the American Zoo and Aquarium Association	Zoology/Mammalogy	D. virginiana	omnivore	travel distance	decrease	Y	spatial	Acclimatory	North America	rural
2007	Harveson, PM; Lopez, RR; Collier, BA; Silvy, NJ	BIOLOGICAL CONSERVATION	Biology	O. virginianus	herbivore	home-range	decrease	Y	spatial	Acclimatory	North America	urban gradient**
2007	Harveson, PM; Lopez, RR; Collier, BA; Silvy, NJ	BIOLOGICAL CONSERVATION	Biology	O. virginianus	herbivore	FID (flight initiation distance)	decrease	Y	alert behavior/response	Regulatory	North America	urban gradient**
2012	Hennessy, CA; Dubach, J; Gehrt, SD	JOURNAL OF MAMMALOGY	Zoology/Mammalogy	C. latrans	carnivore	mating	none	N	NA	NA	North America	urban gradient**
2010	Herr, J; Schley, L; Engel, E; Roper, TJ	MAMMALIAN BIOLOGY	Zoology/Mammalogy	M. foina	omnivore	den selection	shift	Y	mating/reproduction	Acclimatory	Europe	rural
2009	Herr, J; Schley, L; Roper, TJ	JOURNAL OF ZOOLOGY	Zoology/Mammalogy	M. foina	omnivore	spatial patterns	none	N	NA	NA	Europe	rural
2008	Herr, Jan	PhD Thesis	Grad Thesis	M. foina	omnivore	home-range	decrease	Y	spatial	Acclimatory	Europe	rural
2008	Herr, Jan	PhD Thesis	Grad Thesis	M. foina	omnivore	nocturnality	increase	Y	diel	Acclimatory	Europe	rural
2016	Hisano, M; Raichev, EG; Peeva, S; Tsunoda, H; Newman, C; Masuda, R; Georgiev, DM; Kaneko, Y	ETHOLOGY ECOLOGY & EVOLUTION	Ecology	M. foina	omnivore	diet preference	shift	Y	foraging/diet/resource use	Acclimatory	Europe	rural
2019	Hume, G; Brunton, E; Burnett, S	ANIMALS	Zoology/Mammalogy	M. giganteus	herbivore	vigilance/caution	increase	Y	alert behavior/response	Regulatory	Australia	non-urban
2017	Hurtado, G; Mabry, KE	JOURNAL OF MAMMALOGY	Zoology/Mammalogy	D. merriami	herbivore	aggression	none	N	NA	NA	North America	wildland
2017	Hurtado, G; Mabry, KE	JOURNAL OF MAMMALOGY	Zoology/Mammalogy	D. merriami	herbivore	boldness	none	N	NA	NA	North America	wildland
2013	Jaman, MF; Huffman, MA	PRIMATES	Zoology/Mammalogy	M. mulatta	omnivore	grooming	increase	Y	activity	Acclimatory	Asia	rural
2013	Jaman, MF; Huffman, MA	PRIMATES	Zoology/Mammalogy	M. mulatta	omnivore	object manipulation/play	increase	Y	activity	Acclimatory	Asia	rural
2013	Jaman, MF; Huffman, MA	PRIMATES	Zoology/Mammalogy	M. mulatta	omnivore	time feeding	decrease	Y	activity	Acclimatory	Asia	rural
2017	Karelus, DL; McCown, JW; Scheick, BK; van de Kerk, M; Bolker, BM; Oli, MK	JOURNAL OF MAMMALOGY	Zoology/Mammalogy	U. americanus	carnivore	movement speed	increase	Y	spatial	Acclimatory	North America	urban-natural gradient**
2017	Karelus, DL; McCown, JW; Scheick, BK; van de Kerk, M; Bolker, BM; Oli, MK	JOURNAL OF MAMMALOGY	Zoology/Mammalogy	U. americanus	carnivore	spatial patterns	shift	Y	spatial	Acclimatory	North America	urban-natural gradient**
2018	Khatun, MT; Jaman, MF; Rahman, MM; Alam, MM	PRIMATES	Zoology/Mammalogy	S. entellus	herbivore	time feeding	increase	Y	activity	Acclimatory	Asia	rural
2018	Khatun, MT; Jaman, MF; Rahman, MM; Alam, MM	PRIMATES	Zoology/Mammalogy	S. entellus	herbivore	time resting	increase	Y	activity	Acclimatory	Asia	rural
2018	Khatun, MT; Jaman, MF; Rahman, MM; Alam, MM	PRIMATES	Zoology/Mammalogy	S. entellus	herbivore	time traveling	decrease	Y	activity	Acclimatory	Asia	rural
2012	Lehrer, E. W., Schooley, R. L., & Whittington, J. K.	Canadian Journal of Zoology	Zoology/Mammalogy	M. monax	omnivore	vigilance/caution	shift*	Y	alert behavior/response	Regulatory	North America	urban-agricultural gradient**
2015	Lewis, DL; Baruch-Mordo, S; Wilson, KR; Breck, SW; Mao, JS; Broderick, J	ECOSPHERE	General Science	U. americanus	carnivore	resource selection	shift	Y	foraging/diet/resource use	Acclimatory	North America	urban-agricultural gradient**
2020	Lopucki, R; Kiersztyn, A	ECOLOGICAL INDICATORS	Ecology	A. agrarius	omnivore	activity budget	shift	Y	activity	Acclimatory	Europe	rural
2020	Lopucki, R; Kiersztyn, A	ECOLOGICAL INDICATORS	Ecology	A. agrarius	omnivore	diurnality	increase	Y	diel	Acclimatory	Europe	rural
2020	Lopucki, R; Kiersztyn, A	ECOLOGICAL INDICATORS	Ecology	A. agrarius	omnivore	time foraging	increase	Y	foraging/diet/resource use	Acclimatory	Europe	rural
2017	Lyons, J; Mastromonaco, G; Edwards, DB; Schulte-Hostedde, AI	BEHAVIORAL ECOLOGY	Behavior	T. striatus	omnivore	activity budget	shift	Y	activity	Acclimatory	North America	non-urban
2017	Lyons, J; Mastromonaco, G; Edwards, DB; Schulte-Hostedde, AI	BEHAVIORAL ECOLOGY	Behavior	T. striatus	omnivore	grooming	decrease	Y	activity	Acclimatory	North America	natural
2017	Lyons, J; Mastromonaco, G; Edwards, DB; Schulte-Hostedde, AI	BEHAVIORAL ECOLOGY	Behavior	T. striatus	omnivore	latency	increase	Y	activity	Acclimatory	North America	natural
2005	Magle, S., J. Zhu, and K. R. Crooks	Journal of Mammalogy	Zoology/Mammalogy	C. ludovicianus	herbivore	concealment distance	decrease	Y	alert behavior/response	Regulatory	North America	rural
2011	Magle, SB; Angeloni, LM	BEHAVIOUR	Behavior	C. ludovicianus	herbivore	vigilance/caution	decrease	Y	alert behavior/response	Regulatory	North America	urban gradient**
2013	Mangalam, M; Singh, M	PLOS ONE	General Science	M. radiata	omnivore	problem solving	increase	Y	activity	Acclimatory	Asia	natural
2013	Mangalam, M; Singh, M	PLOS ONE	General Science	M. radiata	omnivore	exploratory	increase	Y	behavioral syndrome	Developmental	Asia	natural
2006	Marks, Clive A.; Bloomfield, Tim E.	Wildlife Research	Wildlife Science	V. vulpes	omnivore	den selection	shift	Y	mating/reproduction	Acclimatory	Australia	urban gradient**
2017	Marley, SA; Kent, CPS; Erbe, C; Thiele, D	ACOUSTICS AUSTRALIA	General Science	T. aduncus	carnivore	avoidance	decrease	Y	alert behavior/response	Regulatory	Australia	natural
2017	Marley, SA; Kent, CPS; Erbe, C; Thiele, D	ACOUSTICS AUSTRALIA	General Science	T. aduncus	carnivore	vocalization	increase	Y	alert behavior/response	Regulatory	Australia	natural
2009	Mccleery, RA	LANDSCAPE ECOLOGY	Ecology	S. niger	omnivore	anti-predator	decrease	Y	alert behavior/response	Regulatory	North America	urban-rural gradient**
2009	Mccleery, RA	LANDSCAPE ECOLOGY	Ecology	S. niger	omnivore	FID (flight initiation distance)	decrease	Y	alert behavior/response	Regulatory	North America	urban-rural gradient**
2007	Mccleery, RA; Lopez, Roel R.; Silvy, Nova J.; Kahlick, Sarah N.	The Journal of wildlife management	Wildlife Science	S. niger	omnivore	diet preference	shift	Y	foraging/diet/resource use	Acclimatory	North America	non-urban
2007	Mccleery, RA; Lopez, Roel R.; Silvy, Nova J.; Kahlick, Sarah N.	The Journal of wildlife management	Wildlife Science	S. niger	omnivore	resource selection	shift	Y	foraging/diet/resource use	Acclimatory	North America	non-urban
2016	McNeill, AT; Leung, LKP; Goullet, MS; Gentle, MN; Allen, BL	ANIMALS	Zoology/Mammalogy	C. dingo	carnivore	home-range	decrease	Y	spatial	Acclimatory	Australia	rural
2016	McNeill, AT; Leung, LKP; Goullet, MS; Gentle, MN; Allen, BL	ANIMALS	Zoology/Mammalogy	C. dingo	carnivore	time traveling	decrease	Y	activity	Acclimatory	Australia	rural
2016	McNeill, AT; Leung, LKP; Goullet, MS; Gentle, MN; Allen, BL	ANIMALS	Zoology/Mammalogy	C. dingo	carnivore	travel distance	decrease	Y	spatial	Acclimatory	Australia	rural
2005	Meyer, J; Klemann, N; Halle, S	ACTA THERIOLOGICA	Zoology/Mammalogy	M. coypus	herbivore	diurnality	increase	Y	diel	Acclimatory	Europe	non-urban
2018	Mikula, P; Saffa, G; Nelson, E; Tryjanowski, P	BEHAVIOURAL PROCESSES	Behavior	C. pygerythrus	herbivore	anti-predator	decrease	Y	alert behavior/response	Regulatory	Africa	rural
2018	Mikula, P; Saffa, G; Nelson, E; Tryjanowski, P	BEHAVIOURAL PROCESSES	Behavior	C. pygerythrus	herbivore	FID (flight initiation distance)	decrease	Y	alert behavior/response	Regulatory	Africa	rural
2015	Newsome, Seth D.; Garbe, Heidi M.; Wilson, Evan C.; Gehrt, Stanley D.	Oecologia	Ecology	C. latrans	carnivore	diet preference	shift	Y	foraging/diet/resource use	Acclimatory	North America	urban gradient**
2015	Newsome, Seth D.; Garbe, Heidi M.; Wilson, Evan C.; Gehrt, Stanley D.	Oecologia	Ecology	C. latrans	carnivore	resource selection	shift	Y	foraging/diet/resource use	Acclimatory	North America	urban gradient**
2012	Parker, TS; Nilon, CH	LANDSCAPE AND URBAN PLANNING	Landscape/Urban Planning	S. carolinensis	omnivore	aggression	increase	Y	behavioral syndrome	Developmental	North America	urban gradient**
2012	Parker, TS; Nilon, CH	LANDSCAPE AND URBAN PLANNING	Landscape/Urban Planning	S. carolinensis	omnivore	AD (alert distance)	decrease	Y	alert behavior/response	Regulatory	North America	urban gradient**
2010	Partan, SR; Fulmer, AG; Gounard, MAM; Redmond, JE	CURRENT ZOOLOGY	Zoology/Mammalogy	S. carolinensis	omnivore	activity	increase	Y	activity	Acclimatory	North America	rural
2010	Partan, SR; Fulmer, AG; Gounard, MAM; Redmond, JE	CURRENT ZOOLOGY	Zoology/Mammalogy	S. carolinensis	omnivore	alarm behavior	increase	Y	alert behavior/response	Regulatory	North America	rural
2010	Partan, SR; Fulmer, AG; Gounard, MAM; Redmond, JE	CURRENT ZOOLOGY	Zoology/Mammalogy	S. carolinensis	omnivore	vigilance/caution	increase	Y	alert behavior/response	Regulatory	North America	rural
2017	Persons, WE; Eason, P	ETHOLOGY	Behavior	P. leucopus	omnivore	foraging/hunting	shift	Y	foraging/diet/resource use	Acclimatory	North America	rural
2013	Podgorski, T; Bas, G; Jedrzejewska, B; Sonnichsen, L; Sniezko, S; Jedrzejewski, W; Okarma, H	JOURNAL OF MAMMALOGY	Zoology/Mammalogy	S. scrofa	omnivore	home-range	decrease	Y	spatial	Acclimatory	Europe	rural
2013	Podgorski, T; Bas, G; Jedrzejewska, B; Sonnichsen, L; Sniezko, S; Jedrzejewski, W; Okarma, H	JOURNAL OF MAMMALOGY	Zoology/Mammalogy	S. scrofa	omnivore	nocturnality	increase	Y	diel	Acclimatory	Europe	rural
2013	Podgorski, T; Bas, G; Jedrzejewska, B; Sonnichsen, L; Sniezko, S; Jedrzejewski, W; Okarma, H	JOURNAL OF MAMMALOGY	Zoology/Mammalogy	S. scrofa	omnivore	travel distance	increase	Y	spatial	Acclimatory	Europe	rural
2016	Poessel, Sharon A.; Breck, Stewart W.; Gese, Eric M.	Journal of Mammalogy	Zoology/Mammalogy	C. latrans	carnivore	home-range	shift	Y	spatial	Acclimatory	North America	urban-natural gradient**
2016	Poessel, Sharon A.; Breck, Stewart W.; Gese, Eric M.	Journal of Mammalogy	Zoology/Mammalogy	C. latrans	carnivore	nocturnality	increase	Y	diel	Acclimatory	North America	urban-natural gradient**
2016	Poessel, Sharon A.; Breck, Stewart W.; Gese, Eric M.	Journal of Mammalogy	Zoology/Mammalogy	C. latrans	carnivore	resource selection	shift	Y	foraging/diet/resource use	Acclimatory	North America	urban-natural gradient**
2004	Prange, S; Gehrt, SD; Wiggers, EP	JOURNAL OF MAMMALOGY	Zoology/Mammalogy	P. lotor	carnivore	dispersal	decrease	Y	spatial	Acclimatory	North America	urban-rural gradient**
2004	Prange, S; Gehrt, SD; Wiggers, EP	JOURNAL OF MAMMALOGY	Zoology/Mammalogy	P. lotor	carnivore	home-range	decrease	Y	spatial	Acclimatory	North America	urban-rural gradient**
2003	Riley, SPD; Sauvajot, RM; Fuller, TK; York, EC; Kamradt, DA; Bromley, C; Wayne, RK	CONSERVATION BIOLOGY	Biology	L. rufus	carnivore	nocturnality	increase	Y	diel	Acclimatory	North America	urban-natural gradient**
2003	Riley, SPD; Sauvajot, RM; Fuller, TK; York, EC; Kamradt, DA; Bromley, C; Wayne, RK	CONSERVATION BIOLOGY	Biology	C. latrans	carnivore	nocturnality	increase	Y	diel	Acclimatory	North America	urban-natural gradient**
2003	Riley, SPD; Sauvajot, RM; Fuller, TK; York, EC; Kamradt, DA; Bromley, C; Wayne, RK	CONSERVATION BIOLOGY	Biology	L. rufus	carnivore	spatial patterns	shift	Y	spatial	Acclimatory	North America	urban-natural gradient**
2003	Riley, SPD; Sauvajot, RM; Fuller, TK; York, EC; Kamradt, DA; Bromley, C; Wayne, RK	CONSERVATION BIOLOGY	Biology	C. latrans	carnivore	spatial patterns	shift	Y	spatial	Acclimatory	North America	urban-natural gradient**
2018	Robertson, K.	PHd Thesis	Grad Thesis	C. latrans	carnivore	boldness	increase	Y	behavioral syndrome	Developmental	North America	urban gradient**
2018	Robertson, K.	PHd Thesis	Grad Thesis	C. latrans	carnivore	exploratory	increase	Y	behavioral syndrome	Developmental	North America	urban gradient**
2018	Robertson, K.	PHd Thesis	Grad Thesis	C. latrans	carnivore	FID (flight initiation distance)	decrease	Y	alert behavior/response	Regulatory	North America	urban gradient**
2019	Robins, CW; Kertson, BN; Faulkner, JR; Wirsing, AJ	ECOSPHERE	General Science	P. concolor	carnivore	foraging/hunting	shift	Y	foraging/diet/resource use	Acclimatory	North America	urban-rural gradient**
2009	Rosatte, Rick; Allan, Mike	The Canadian Field-Naturalist	General Science	V. vulpes	omnivore	home-range	decrease	Y	spatial	Acclimatory	North America	rural
2015	Sarno, RJ; Parsons, M; Ferris, A	URBAN ECOSYSTEMS	Landscape/Urban Planning	S. carolinensis	omnivore	vigilance/caution	increase	Y	alert behavior/response	Regulatory	North America	urban-rural gradient**
2018	Schafer, TLJ; Breck, SW; Baruch-Mordo, S; Lewis, DL; Wilson, KR; Mao, JS; Day, TL	URSUS	Zoology/Mammalogy	U. americanus	carnivore	den selection	none	N	NA	NA	North America	urban gradient**
2015	Scheun, J; Bennett, NC; Ganswindt, A; Nowack, J	SCIENCE OF NATURE	General Science	G. moholi	omnivore	activity budget	shift	Y	activity	Acclimatory	Africa	rural
2015	Scheun, J; Bennett, NC; Ganswindt, A; Nowack, J	SCIENCE OF NATURE	General Science	G. moholi	omnivore	activity budget	shift	Y	activity	Acclimatory	Africa	rural
2015	Scheun, J; Bennett, NC; Ganswindt, A; Nowack, J	SCIENCE OF NATURE	General Science	G. moholi	omnivore	diet preference	shift	Y	foraging/diet/resource use	Acclimatory	Africa	rural
2019	Speakman, CN; Johnstone, CP; Robb, K	MARINE MAMMAL SCIENCE	Zoology/Mammalogy	A. pusillus ssp. doriferus	carnivore	AD (alert distance)	shift*	Y	alert behavior/response	Regulatory	Australia	urban gradient**
2019	Speakman, CN; Johnstone, CP; Robb, K	MARINE MAMMAL SCIENCE	Zoology/Mammalogy	A. pusillus ssp. doriferus	carnivore	escape activity	decrease	Y	alert behavior/response	Regulatory	Australia	urban gradient**
2019	Speakman, CN; Johnstone, CP; Robb, K	MARINE MAMMAL SCIENCE	Zoology/Mammalogy	A. pusillus ssp. doriferus	carnivore	vigilance/caution	increase	Y	alert behavior/response	Regulatory	Australia	urban gradient**
2017	Stillfried, M; Gras, P; Borner, K; Goritz, F; Painer, J; Rollig, K; Wenzler, M; Hofer, H; Ortmann, S; Kramer-Schadt, S	FRONTIERS IN ECOLOGY AND EVOLUTION	Ecology	S. scrofa	omnivore	resource selection	shift	Y	foraging/diet/resource use	Acclimatory	Europe	rural
2017	Stillfried, M; Gras, P; Borner, K; Goritz, F; Painer, J; Rollig, K; Wenzler, M; Hofer, H; Ortmann, S; Kramer-Schadt, S	FRONTIERS IN ECOLOGY AND EVOLUTION	Ecology	S. scrofa	omnivore	spatial patterns	shift	Y	spatial	Acclimatory	Europe	rural
2017	Stillfried, M; Gras, P; Borner, K; Goritz, F; Painer, J; Rollig, K; Wenzler, M; Hofer, H; Ortmann, S; Kramer-Schadt, S	FRONTIERS IN ECOLOGY AND EVOLUTION	Ecology	S. scrofa	omnivore	FID (flight initiation distance)	decrease	Y	alert behavior/response	Regulatory	Europe	rural
2018	Tomas, LS; Teich, E; Dausmann, KH; Reher, S; Turner, JM	HYSTRIX-ITALIAN JOURNAL OF MAMMALOGY	Zoology/Mammalogy	S. vulgaris	omnivore	activity budget	shift	Y	activity	Acclimatory	Europe	urban-natural gradient**
2018	Tomas, LS; Teich, E; Dausmann, KH; Reher, S; Turner, JM	HYSTRIX-ITALIAN JOURNAL OF MAMMALOGY	Zoology/Mammalogy	S. vulgaris	omnivore	home-range	decrease	Y	spatial	Acclimatory	Europe	urban-natural gradient**
2016	Uchida, K; Suzuki, K; Shimamoto, T; Yanagawa, H; Koizumi, I	JOURNAL OF ZOOLOGY	Zoology/Mammalogy	S. vulgaris	omnivore	FID (flight initiation distance)	decrease	Y	alert behavior/response	Regulatory	Asia	rural
2019	Uchida, K; Suzuki, KK; Shimamoto, T; Yanagawa, H; Koizumi, I	BEHAVIORAL ECOLOGY	Behavior	S. vulgaris	omnivore	AD (alert distance)	decrease	Y	alert behavior/response	Regulatory	Asia	urban-rural gradient**
2019	Uchida, K; Suzuki, KK; Shimamoto, T; Yanagawa, H; Koizumi, I	BEHAVIORAL ECOLOGY	Behavior	S. vulgaris	omnivore	FID (flight initiation distance)	decrease	Y	alert behavior/response	Regulatory	Asia	urban-rural gradient**
2019	Uchida, K; Suzuki, KK; Shimamoto, T; Yanagawa, H; Koizumi, I	BEHAVIORAL ECOLOGY	Behavior	S. vulgaris	omnivore	vigilance/caution	decrease	Y	alert behavior/response	Regulatory	Asia	urban-rural gradient**
2020	Uchida, K., Shimamoto, T., Yanagawa, H., & Koizumi, I.	URBAN ECOSYSTEMS	Landscape/Urban Planning	S. vulgaris	omnivore	FID (flight initiation distance)	none	N	NA	NA	Asia	rural
2020	Uchida, K., Shimamoto, T., Yanagawa, H., & Koizumi, I.	URBAN ECOSYSTEMS	Landscape/Urban Planning	S. vulgaris	omnivore	alert response	shift*	Y	alert behavior/response	Regulatory	Asia	rural
2020	Uchida, K., Shimamoto, T., Yanagawa, H., & Koizumi, I.	URBAN ECOSYSTEMS	Landscape/Urban Planning	S. vulgaris	omnivore	VED (vertical escape distance)	decrease	Y	alert behavior/response	Regulatory	Asia	rural
2018	Van Helden, BE; Speldewinde, PC; Close, PG; Comer, SJ	AUSTRALIAN MAMMALOGY	Zoology/Mammalogy	P. occidentalis	herbivore	home-range	decrease	Y	spatial	Acclimatory	Australia	urban gradient**
2009	Watson, Elizabeth L	Masters Thesis	Grad Thesis	M. monax	omnivore	home-range	decrease	Y	spatial	Acclimatory	North America	urban-agricultural gradient**
2009	Watson, Elizabeth L	Masters Thesis	Grad Thesis	M. monax	omnivore	spatial patterns	shift*	Y	spatial	Acclimatory	North America	urban-agricultural gradient**
2009	Watson, Elizabeth L	Masters Thesis	Grad Thesis	M. monax	omnivore	vigilance/caution	shift*	Y	alert behavior/response	Regulatory	North America	urban-agricultural gradient**
2015	Widdows, CD; Downs, CT	URBAN ECOSYSTEMS	Landscape/Urban Planning	G. tigrina	carnivore	diet preference	shift	Y	foraging/diet/resource use	Acclimatory	Africa	urban gradient**
2015	Widdows, CD; Downs, CT	URBAN ECOSYSTEMS	Landscape/Urban Planning	G. tigrina	carnivore	resource selection	shift	Y	foraging/diet/resource use	Acclimatory	Africa	urban gradient**
2012	Wright, J. D., Burt, M. S., & Jackson, V. L. (2012).	Northeastern Naturalist	General Science	D. virginiana	omnivore	home-range	decrease	Y	spatial	Acclimatory	North America	rural
2019	Young, JK; Golla, J; Draper, JP; Broman, D; Blankenship, T; Heilbrun, R	ANIMALS	Zoology/Mammalogy	L. rufus	carnivore	home-range	decrease	Y	spatial	Acclimatory	North America	urban gradient**
2016	Ziege, M; Babitsch, D; Brix, M; Kriesten, S; Straskraba, S; Wenninger, S; Wronski, T; Plath, M	MAMMALIAN BIOLOGY	Zoology/Mammalogy	O. cuniculus	herbivore	activity budget	shift	Y	activity	Acclimatory	Europe	urban-rural gradient**
2016	Ziege, M; Babitsch, D; Brix, M; Kriesten, S; Straskraba, S; Wenninger, S; Wronski, T; Plath, M	MAMMALIAN BIOLOGY	Zoology/Mammalogy	O. cuniculus	herbivore	time resting	decrease	Y	activity	Acclimatory	Europe	urban-rural gradient**
2016	Ziege, M; Babitsch, D; Brix, M; Kriesten, S; Straskraba, S; Wenninger, S; Wronski, T; Plath, M	MAMMALIAN BIOLOGY	Zoology/Mammalogy	O. cuniculus	herbivore	anti-predator	decrease	Y	alert behavior/response	Regulatory	Europe	urban-rural gradient**
2016	Ziege, M; Bierbach, D; Bischoff, S; Brandt, AL; Brix, M; Greshake, B; Merker, S; Wenninger, S; Wronski, T; Plath, M	BMC ECOLOGY	Ecology	O. cuniculus	herbivore	latrine use	shift	Y	social	Acclimatory	Europe	urban-rural gradient**
2016	Ziege, M; Bierbach, D; Bischoff, S; Brandt, AL; Brix, M; Greshake, B; Merker, S; Wenninger, S; Wronski, T; Plath, M	BMC ECOLOGY	Ecology	O. cuniculus	herbivore	spatial patterns	shift	Y	spatial	Acclimatory	Europe	urban-rural gradient**
* indicates multi-directional shift (modulation) in response to varying environmental stimuli
** indicates 1 or more comparative population(s) along the specified gradient
