# Supplementary material for: Behavior Change in Urban Mammals: A Systematic Review
Source: Frontiers journal article supplement (doi:10.3389/fevo.2020.576665), 2020-11-16
Supplement: Table_3.docx [file Table_3.docx]

Table S3: Taxa behavior changes grouped by adaptation type from studies conducted from 1987-2020.

| Order | Guild | Regulatory Adaptation | Acclimatory Adaptation | Developmental Adaptation |
| --- | --- | --- | --- | --- |
| Artiodactyla (11) | carnivore (2) herbivore (3) omnivore (6) | anti-predator, avoidance, FID (flight initiation distance), vocalization | home-range, nocturnality, resource selection, spatial patterns, travel distance | NA |
| Carnivora (62) | carnivore (53) omnivore (9) | AD (alert distance), anti-predator, avoidance, FID (flight initiation distance), escape activity, vigilance/caution | activity budget, den selection, denning time, diet preference, dispersal, fecundity, foraging/hunting, home-range, movement speed, nocturnality, resource selection, spatial patterns, territoriality, time encamped, time/distance traveling, time foraging | boldness, exploratory |
| Chiroptera (2) | carnivore (2) | NA | home-range, time foraging | NA |
| Didelphimorphia (3) | omnivore (3) | NA | home-range, travel distance | NA |
| Diprotodontia (5) | carnivore (3) herbivore (2) | vigilance/caution | diet preference, home-range | NA |
| Eulipotyphla (3) | omnivore (3) | avoidance | spatial patterns, diel activity | NA |
| Lagomorpha (7) | herbivore (7) | anti-predator, vigilance/caution | activity budget, latrine use, spatial patterns, time resting | NA |
| Peramelemorphia (1) | omnivore (1) | NA | home-range | NA |
| Primate (18) | herbivore (8) omnivore (10) | anti-predator, vigilance/caution | activity budget, conspecific tolerance, diet preference, foraging/hunting, grooming, play, problem-solving, time feeding, time resting, time traveling | exploratory |
| Rodentia (43) | herbivore (4) omnivore (39) | AD (alert distance), alarm behavior, alert response, anti-predator, concealment distance, FID (flight initiation distance), vigilance/caution, VED (vertical escape distance) | activity budget, den selection, denning time, diet preference, dispersal, diurnality, foraging/hunting, GUD (giving-up density), home-range, latency, resource selection, spatial patterns, time foraging | aggression |
