# Supplementary material for: Behavior Change in Urban Mammals: A Systematic Review
Source: Frontiers journal article supplement (doi:10.3389/fevo.2020.576665), 2020-11-16
Supplement: Table_4.docx [file Table_4.docx]

Supplementary Material, Figures


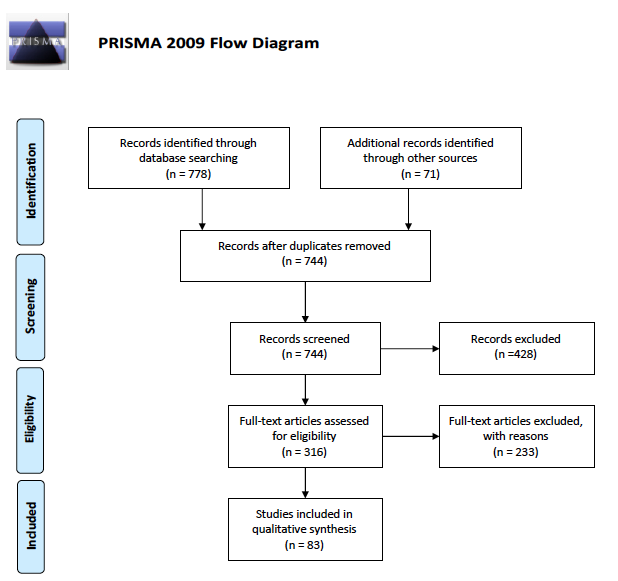


Figure S1.  PRISMA flow diagram depicting iteration of our systematic review.


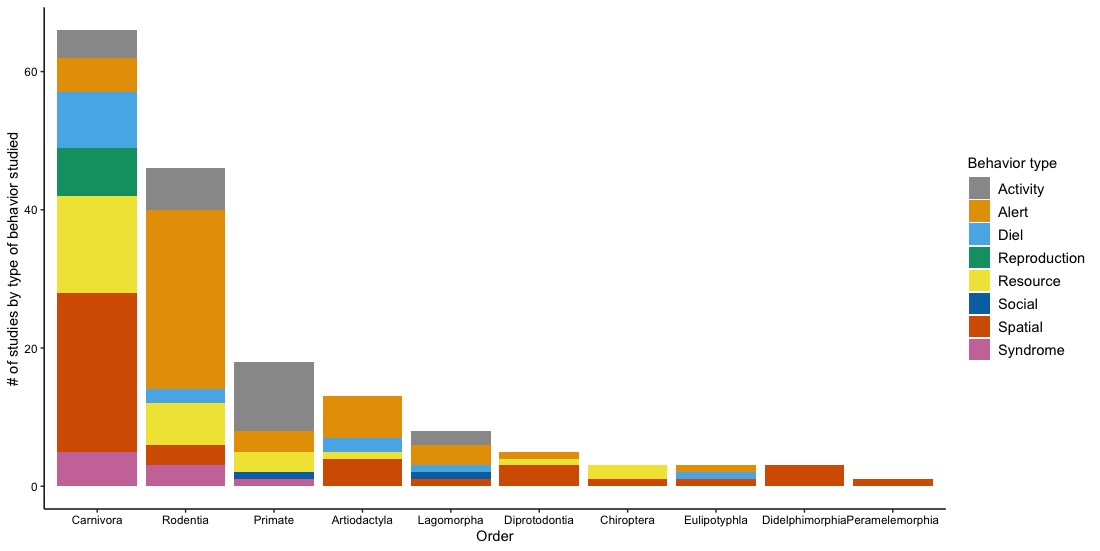


Figure S2.  Number of studies on 8 behavior types in urban mammal between 1987-2020 categorized by order.


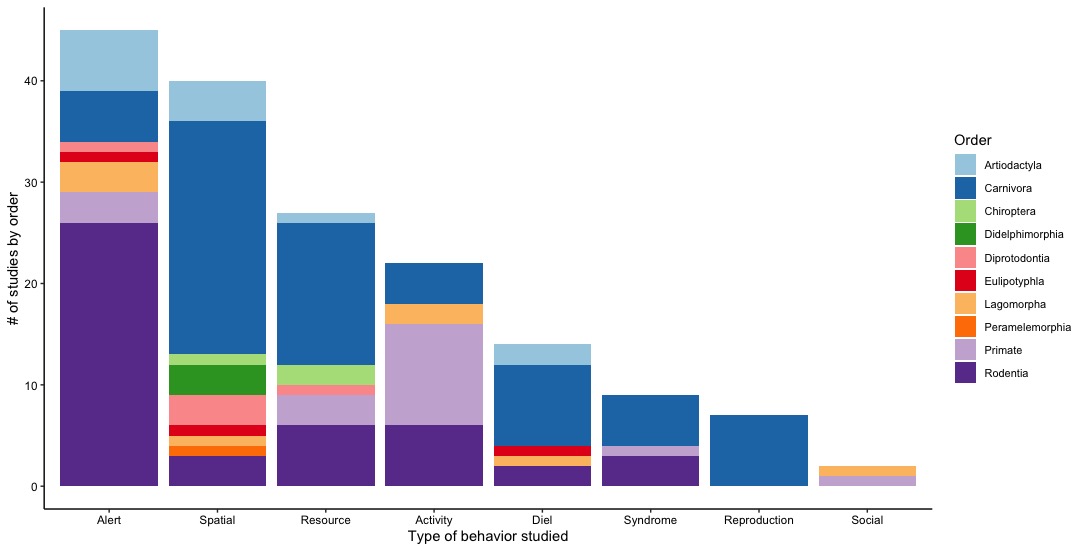


Figure S3.  Number of studies on urban mammal orders between 1987-2020 categorized by behavior type.
